# Supplementary material for: Insights into energy-efficient and eco-friendly sealing of anodic aluminum oxide film holes with alkaline earth metal salts
Source: Royal Society of Chemistry journal article supplement (doi:10.1039/c7ra10633e), 2017-01-01
Supplement: c7ra10633e1.pdf [file c7ra10633e1.pdf]

## **Electronic Supporting Information**

**for**

### **Insights into energy-efficient and eco-friendly sealing of anodic aluminum oxide film holes with alkaline earth metal salts**

Hongyang Wei,<sup>a</sup> Dongchu Chen,<sup>\*a</sup> Huawen Hu,<sup>\*a</sup> Menglei Chang,<sup>a</sup> Xiufang Ye<sup>a</sup> and Meifeng Wang<sup>b</sup>

<sup>a</sup> *School of Material Science and Energy Engineering, Foshan University, Foshan 528000, Guangdong, China;*

<sup>b</sup> *School of Material Science and Engineering, Nanchang Hangkong University, Nanchang 330063, China*

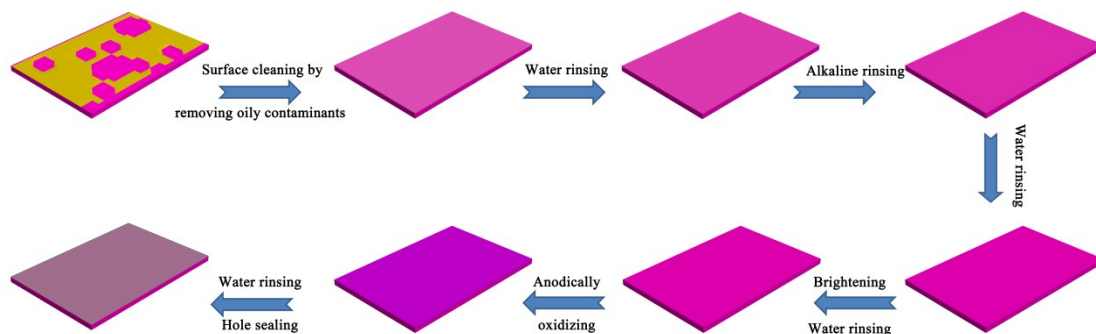

**Figure S1** Schematic illustration of the main procedures involved in the anodic oxidation and hole sealing processing of the aluminum alloy.

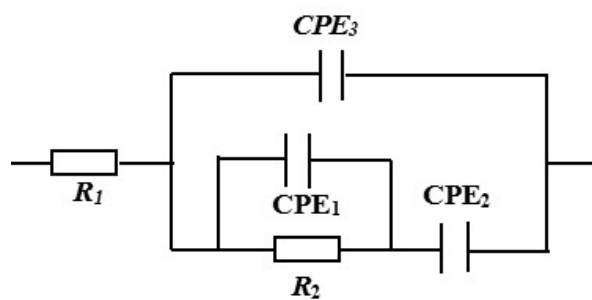

**Figure S2** Diagram of the equivalent circuit for measuring the electrochemical properties of the sealed sample.

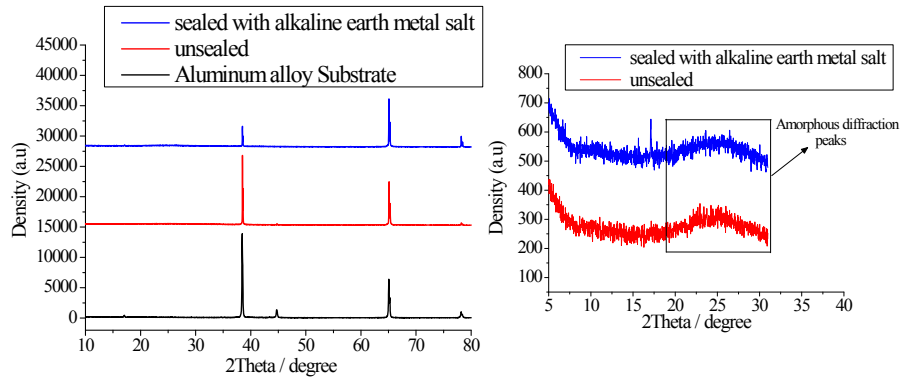

**Figure S3** XRD patterns of aluminum alloy substrate before anodic oxidation, the unsealed sample, and the sample sealed by alkaline earth metal salt. The XRD patterns presented at right are magnified from the left ones.
